# Supplementary material for: Methods for Enrichment and Assignment of N-Acetylglucosamine Modification Sites
Source: PubMed Central journal article supplement (PMC8724609; doi:10.1074/mcp.r120.002206), 2021-02-09
Supplement: mmc1.pdf [file mmc1.pdf]

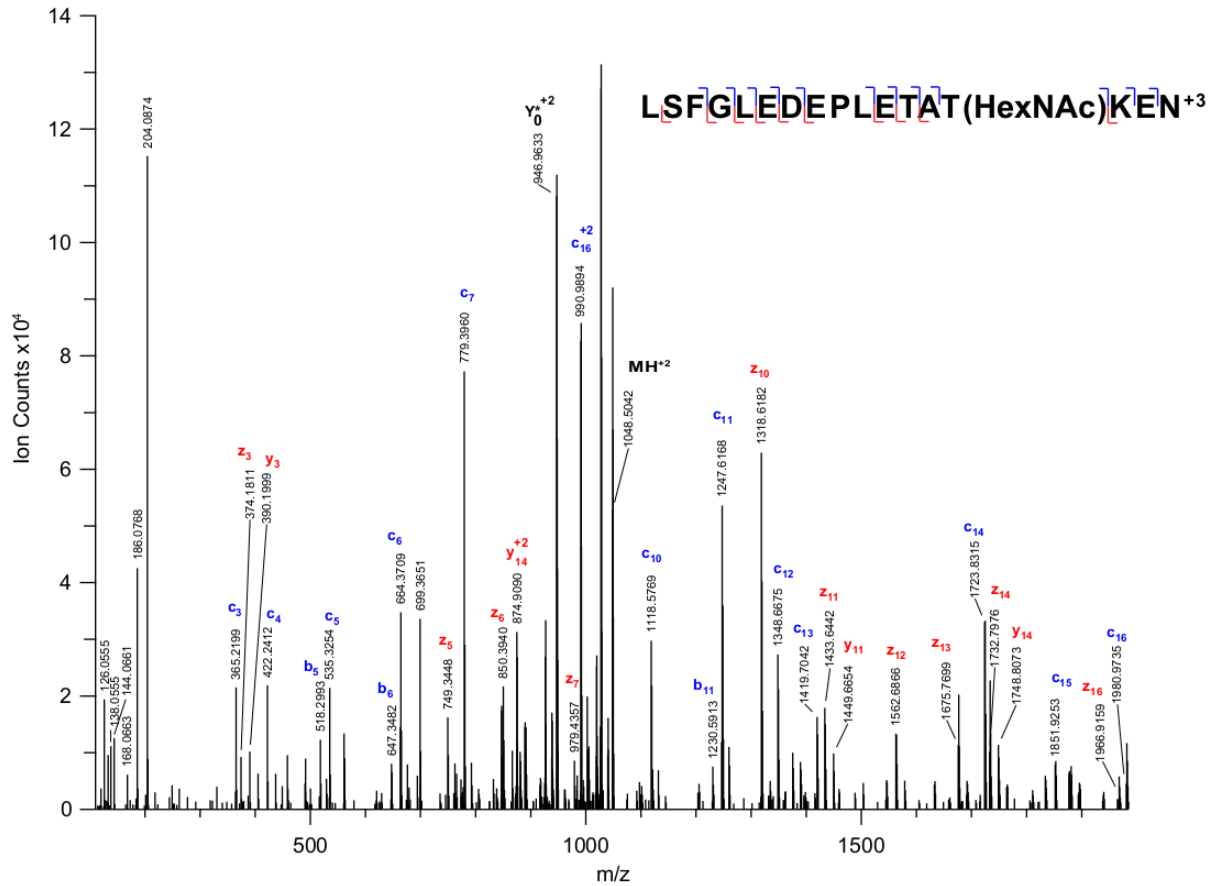

Supplementary Figure S1. Annotated EThcD spectrum of O-GalNAc modified peptide from Erlin-2. The fragments c<sub>14</sub> and z<sub>5</sub> localize the HexNAc moiety to threonine 336. Ions with a glycan loss are represented with an \*.

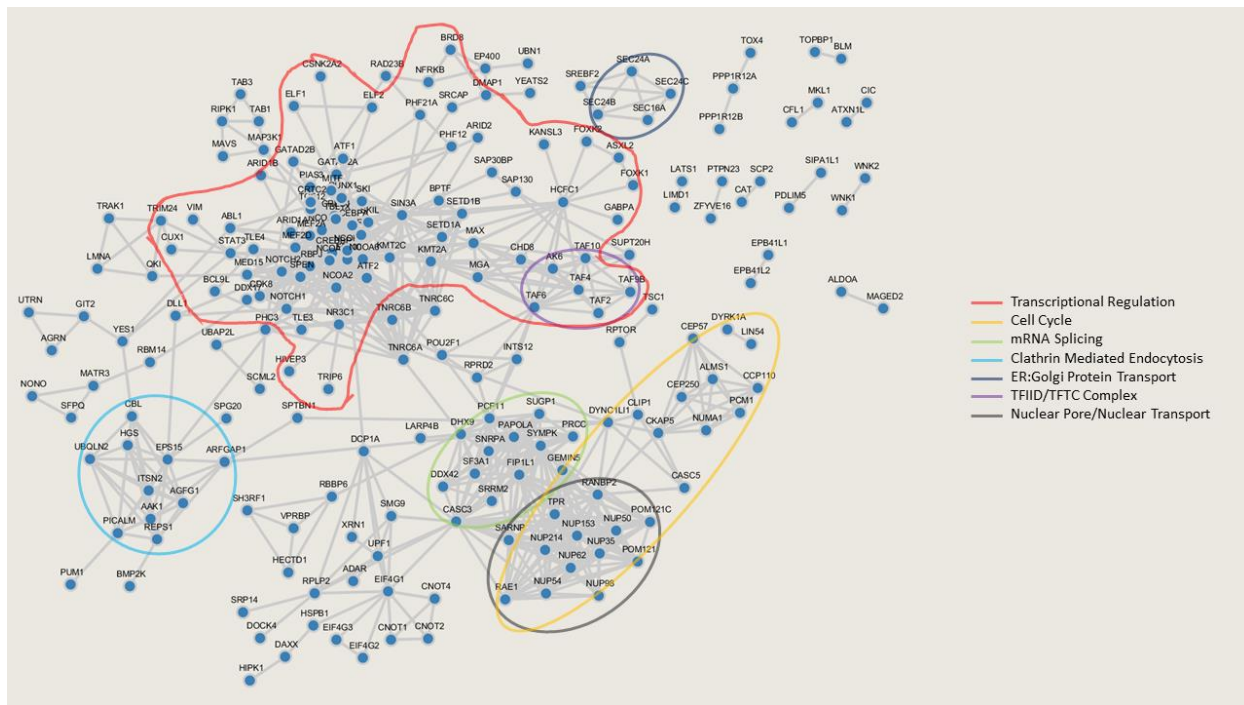

Supplementary Figure S2. O-GlcNAc modified protein network analysis using Cytoscape and stringApp. Proteins with at least one connection are shown.
